# Supplementary material for: Flexible dielectric papers based on biodegradable cellulose nanofibers and carbon nanotubes for dielectric energy storage
Source: Royal Society of Chemistry journal article supplement (doi:10.1039/c6tc01501h), 2016-01-01
Supplement: c6tc01501h1.pdf [file c6tc01501h1.pdf]

## Electronic Supplementary Information

### Flexible Dielectric Papers Based on Biodegradable Cellulose Nanofibers and Carbon Nanotubes for Dielectric Energy Storage

*Xiaoliang Zeng<sup>a,b</sup>, Libo Deng<sup>c</sup>, Yimin Yao<sup>a,b</sup>, Fangfang Wang<sup>a</sup>, Rong Sun<sup>a,\*</sup>, Jianbin Xu<sup>d,\*</sup>, and Ching-Ping Wong<sup>d,e</sup>*

<sup>a</sup>Shenzhen Institute of Advanced Technology, Chinese Academy of Sciences, Shenzhen, 518055, China. E-mail: rong.sun@siat.ac.cn

<sup>b</sup>Shenzhen College of Advanced Technology, University of Chinese Academy of Sciences, Shenzhen, 518055, China.

<sup>c</sup>College of Chemistry and Environmental Engineering, Shenzhen University, Shenzhen 518060, China

<sup>d</sup>Department of Electronics Engineering, The Chinese University of Hong Kong, 999077, Hong Kong, China. E-mail: jbxu@ee.cuhk.edu.hk

<sup>e</sup>School of Mechanical Engineering, Georgia Institute of Technology, 771 Ferst Drive, Atlanta, Georgia 30332, United States.

#### Contents

Fig. S1. (a) Atomic force microscopy image of the CNFs. (b) Diameter distribution of the CNFs.

Fig. S2. Optical image of CNF/CNT water solution (left) and CNT water solution (right) after sonication for 24 h.

Fig. S3. (a) Optical image of pure CNF paper showing high optical transparency. (b) UV-vis transmittance spectra of the CNF/CNT papers with different CNT loadings.

Fig. S4. (a) SEM surface morphological micrograph, and (b) a magnified image of common A4 paper.

Fig. S5. Dielectric constant of CNF/BaTiO<sub>3</sub> paper with different BaTiO<sub>3</sub> loadings.

Fig. S6. Schematic *P-E* loop of a dielectric material with the discharged energy density represented by the area colored in green.

Fig. S7. Linear relationship between Log (*E*) and Log (-ln (1-P(*E*))) to obtain the parameters  $\beta$  and  $E_b$ .

Table S1. Mechanical properties of the CNF/CNT papers with different CNT loadings.

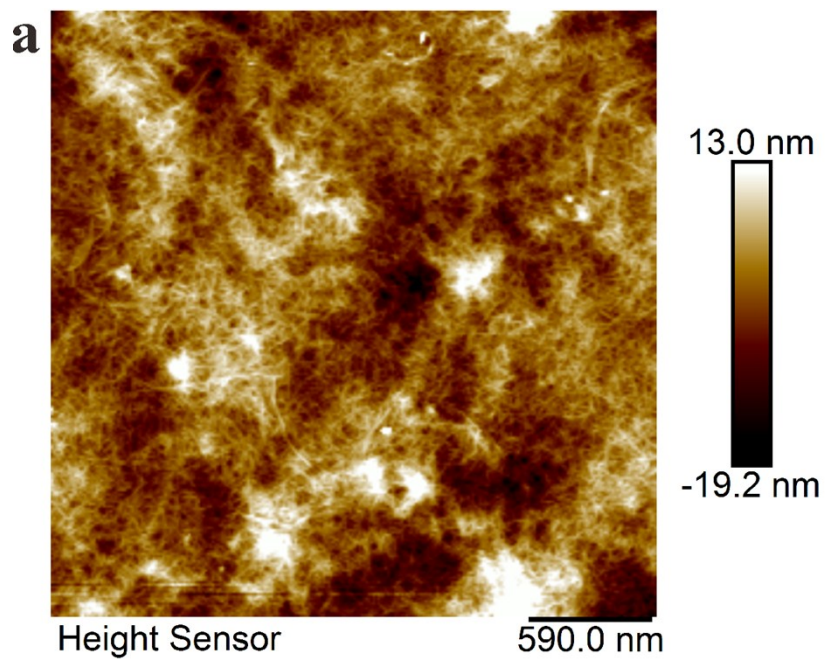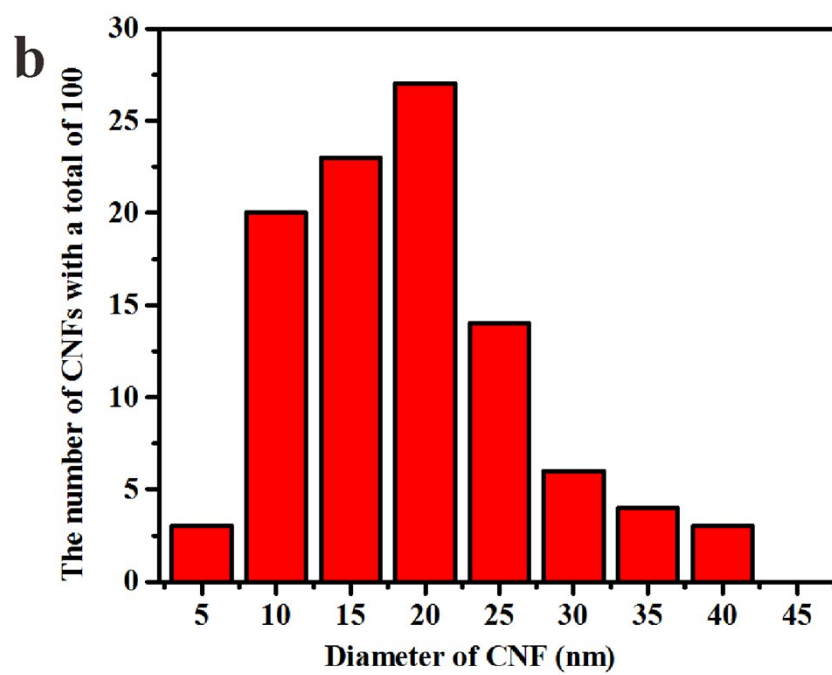

Fig. S1. (a) Atomic force microscopy image of the CNFs. (b) Diameter distribution of the CNFs.

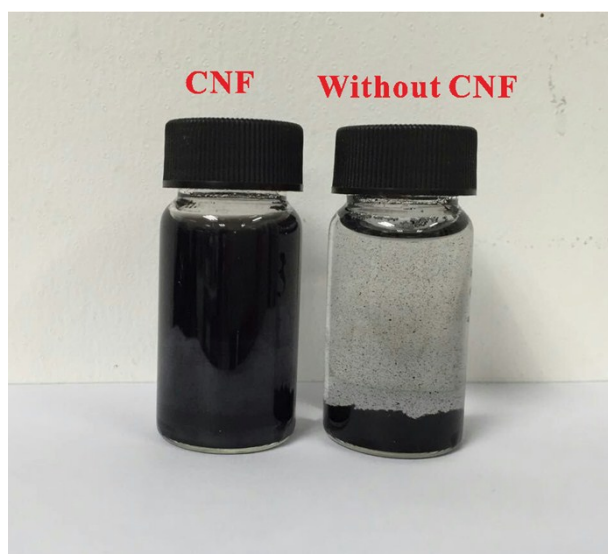

Fig. S2. Optical image of CNF/CNT water solution (left) and CNT water solution (right) after sonication for 24 h.

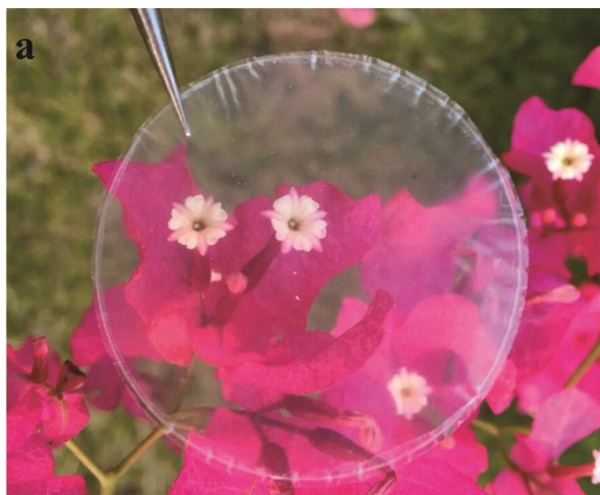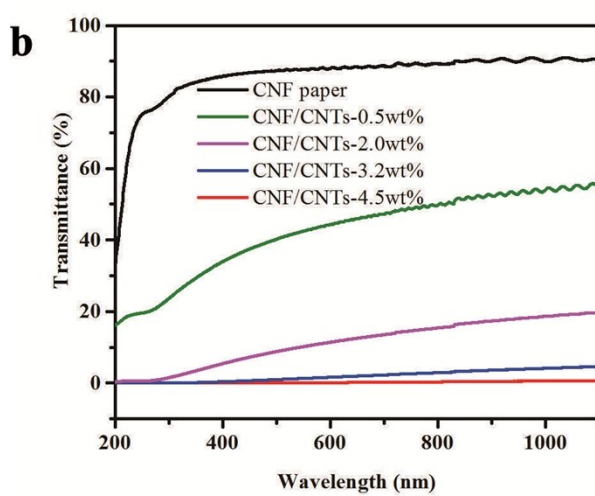

Fig. S3. (a) Optical image of pure CNF paper showing high optical transparency. (b) UV-vis transmittance spectra of the CNF/CNT papers with different CNT loadings.

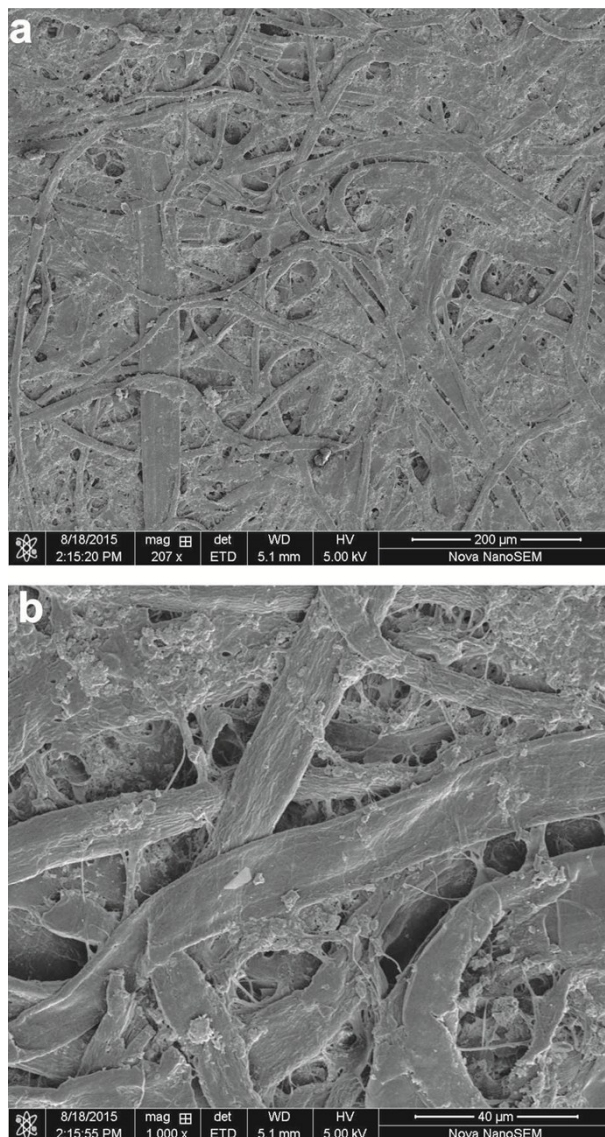

Fig. S4. (a) SEM surface morphological micrograph, and (b) a magnified micrograph of common A4 paper.

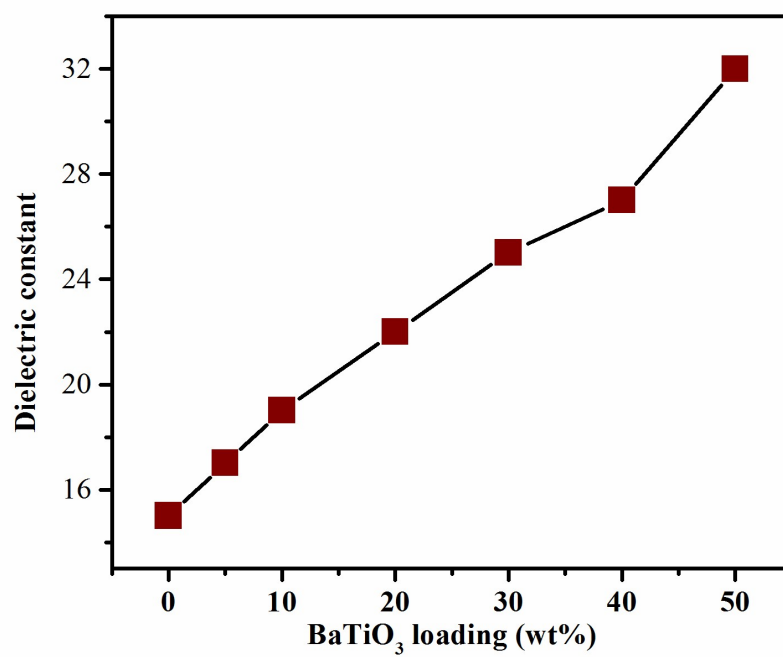

Fig. S5. Dielectric constant of CNF/BaTiO<sub>3</sub> paper with different BaTiO<sub>3</sub> loadings.

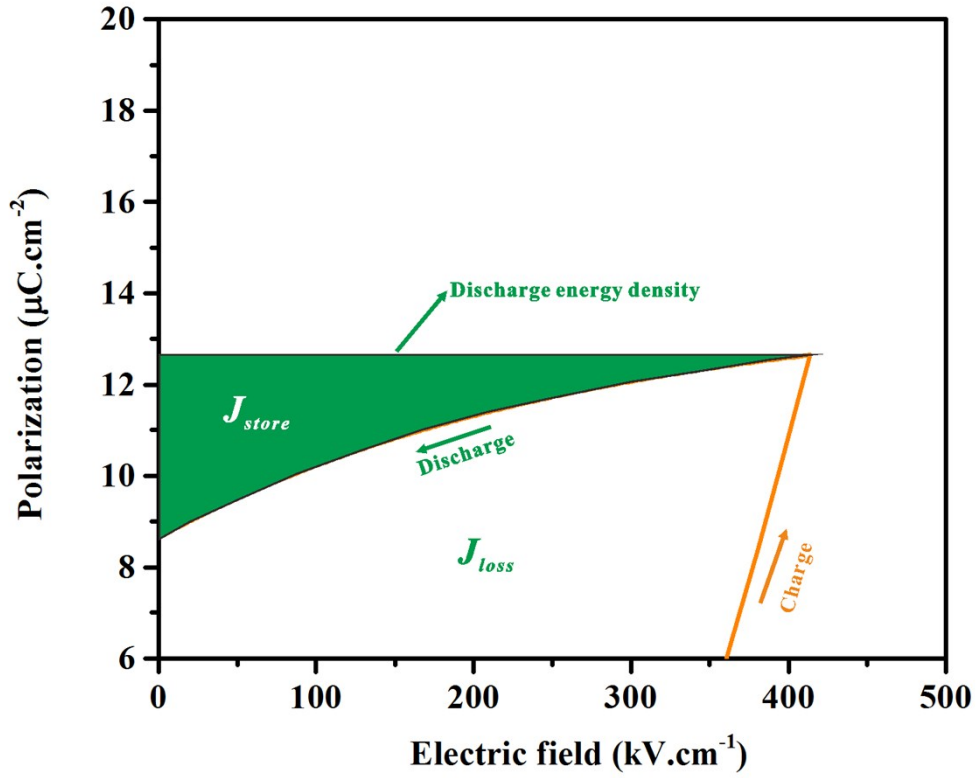

Fig. S6. Schematic  $P$ - $E$  loop of a dielectric material with the discharged energy density represented by the area colored in green.

The energy efficiency  $\eta$ , can be calculated as

$$\eta = J_{store}/(J_{store} + J_{loss}) \quad (1)$$

where  $J_{store}$  and  $J_{loss}$  are energy density and energy loss, respectively, calculated from the

$D$ - $E$  loops in Fig. S5.

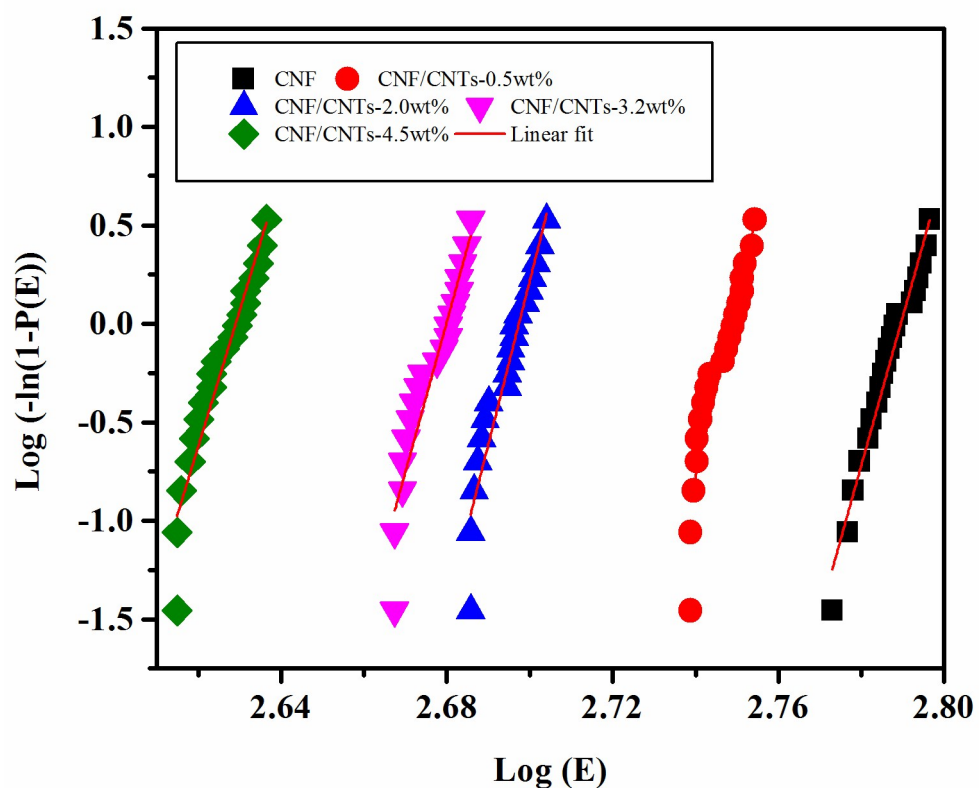

Fig. S7. Linear relationship between  $\log (E)$  and  $\log (-\ln (1-P(E)))$  to obtain the parameters  $\beta$  and  $E_b$ .



Table S1. Mechanical properties of the CNF/CNT papers with different CNT loadings.

| samples                | tensile Strength<br>(MPa) | Young's modulus<br>(GPa) | elongation (%) |
|------------------------|---------------------------|--------------------------|----------------|
| CNF paper              | 95.0±11                   | 6.0±1.0                  | 2.0±0.7        |
| CNF/CNT–0.5 wt % paper | 103.6±15                  | 7.7±0.8                  | 1.5±1.4        |
| CNF/CNT–2.0 wt % paper | 116.7±13                  | 8.2±0.7                  | 2.1±0.4        |
| CNF/CNT–3.2 wt % paper | 113.3±16                  | 6.3±1.1                  | 3.2±0.5        |
| CNF/CNT–4.5 wt % paper | 107.5±12                  | 5.6±0.8                  | 3.3±0.4        |
